# Supplementary material
Source: PubMed Central journal article supplement (PMC5331858)
Supplement: NIHMS747566-supplement-Figures_and_Table.pdf [file NIHMS747566-supplement-Figures_and_Table.pdf]

# Supplementary Figure 1

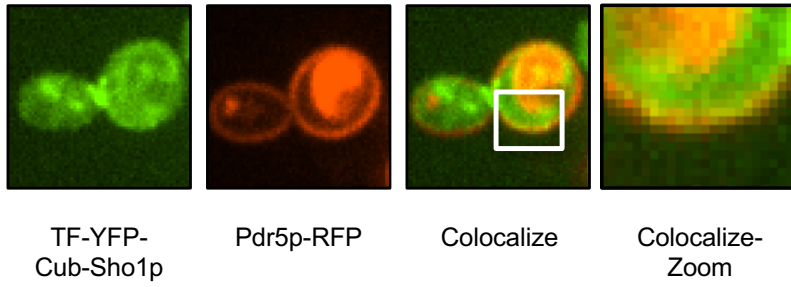

# Supplementary Figure 2

A

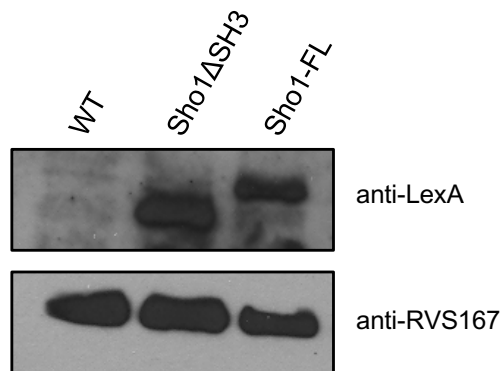

B

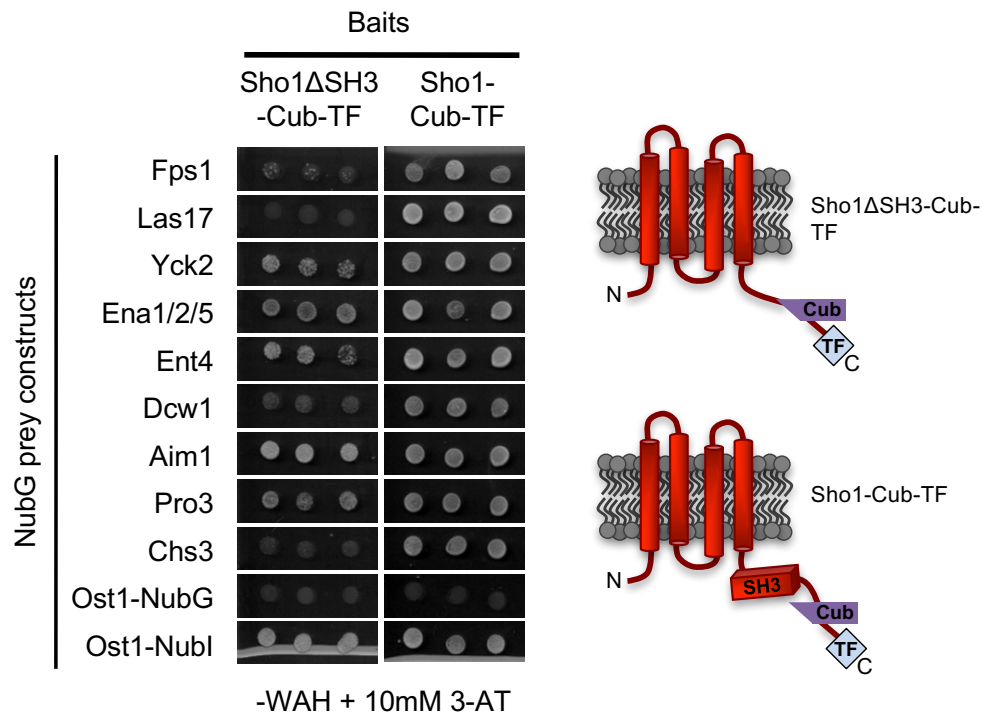

# Supplementary Figure 3

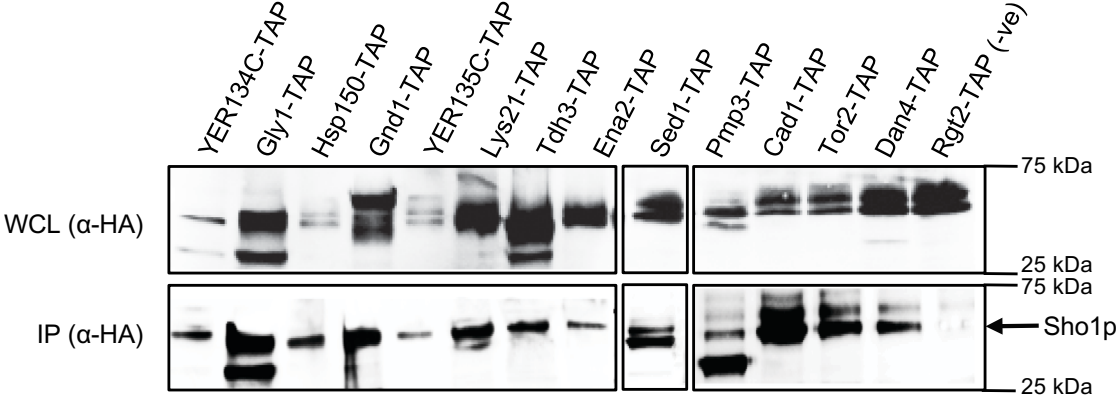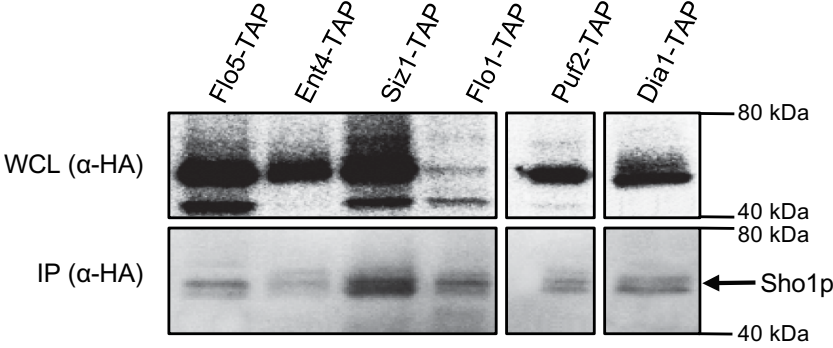

# Supplementary Figure 4

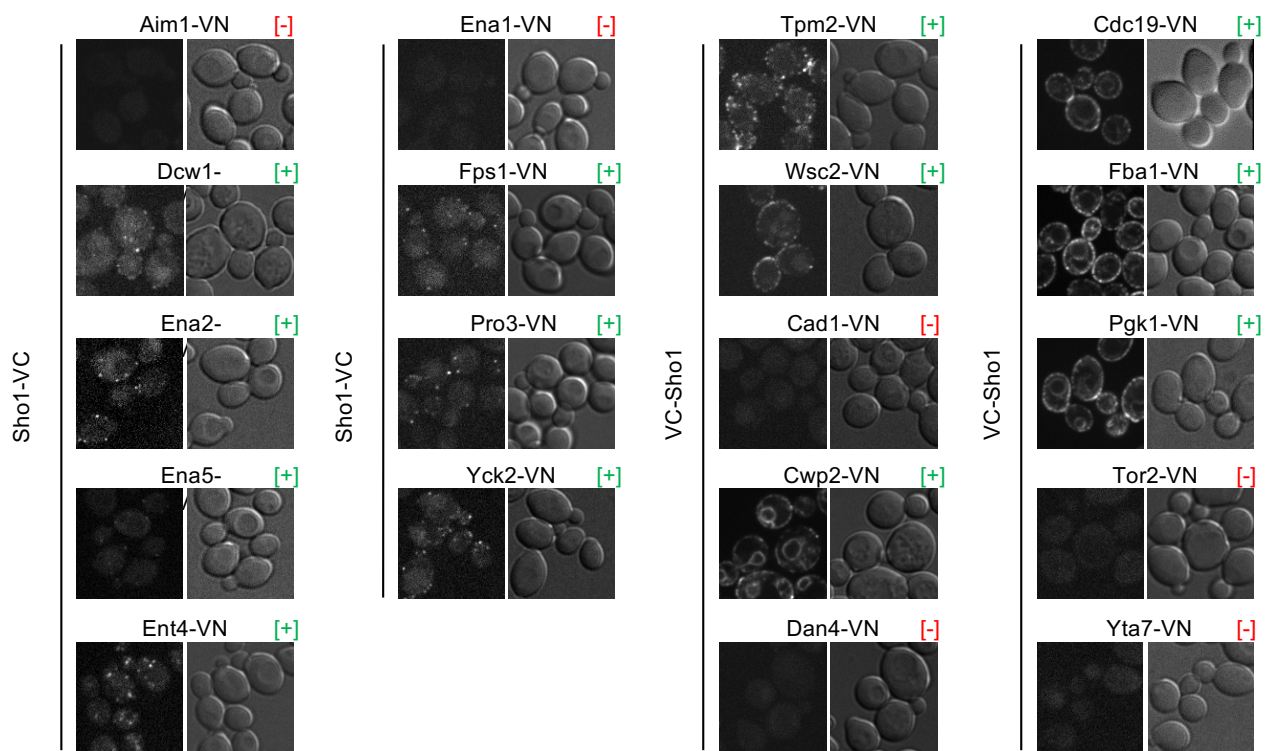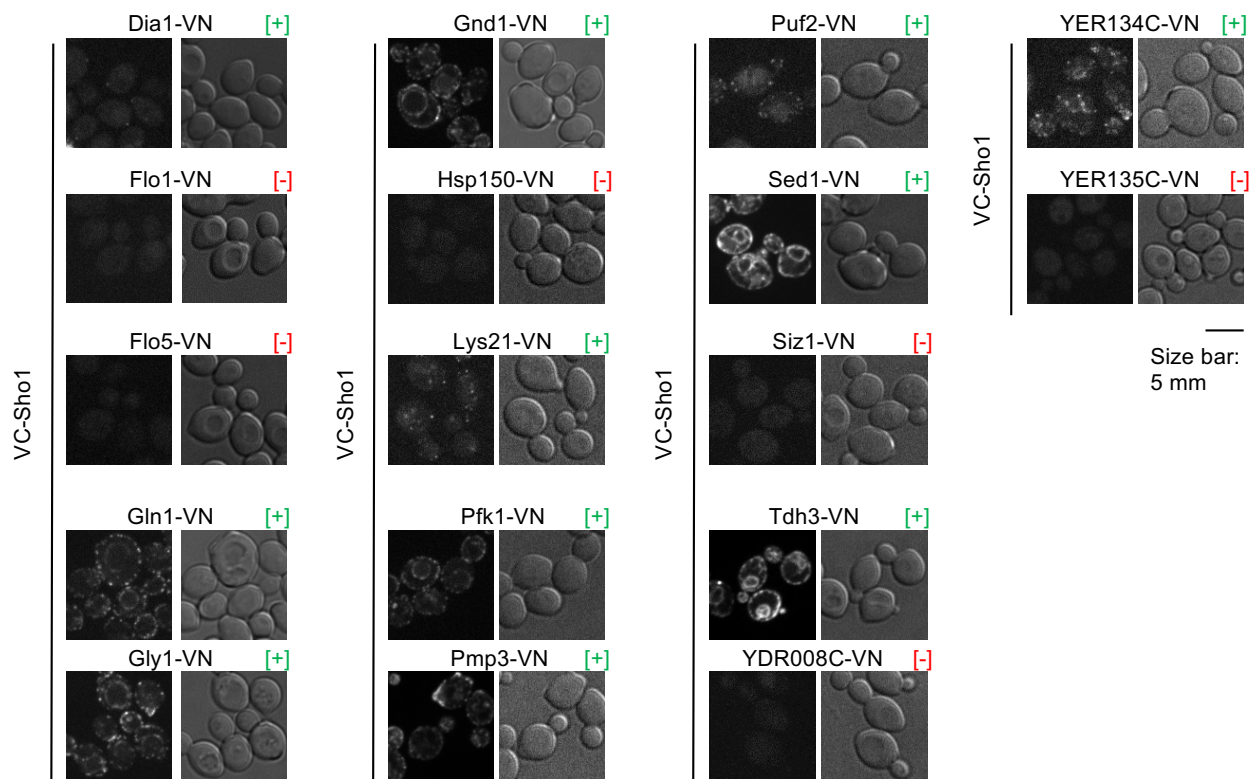

# Supplementary Figure 5

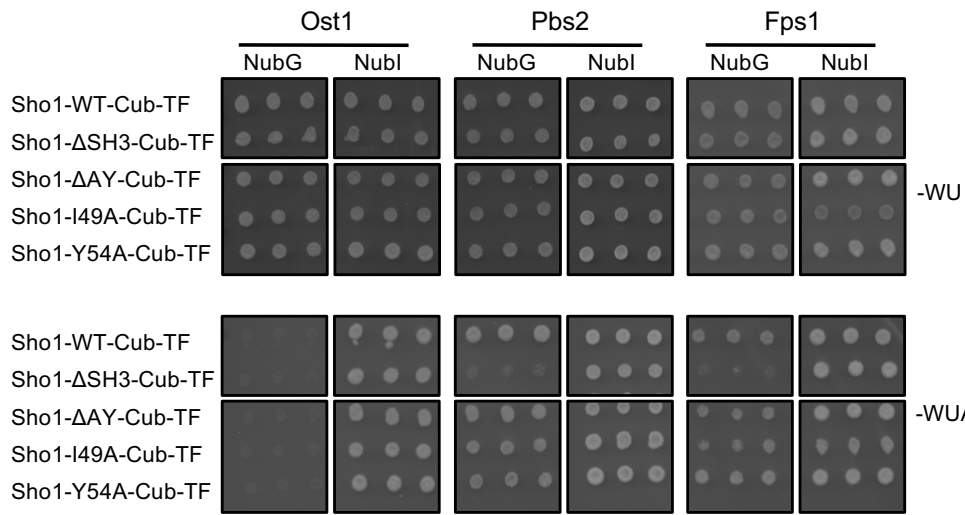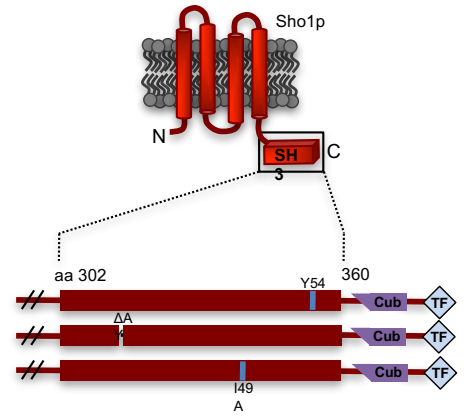

# Supplementary Figure 6

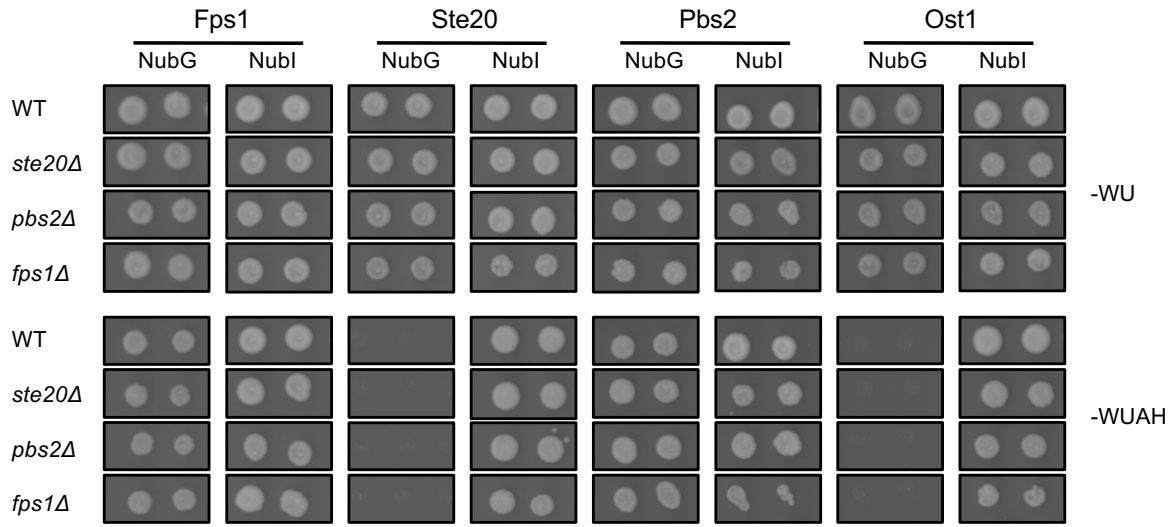

# Supplementary Figure 7

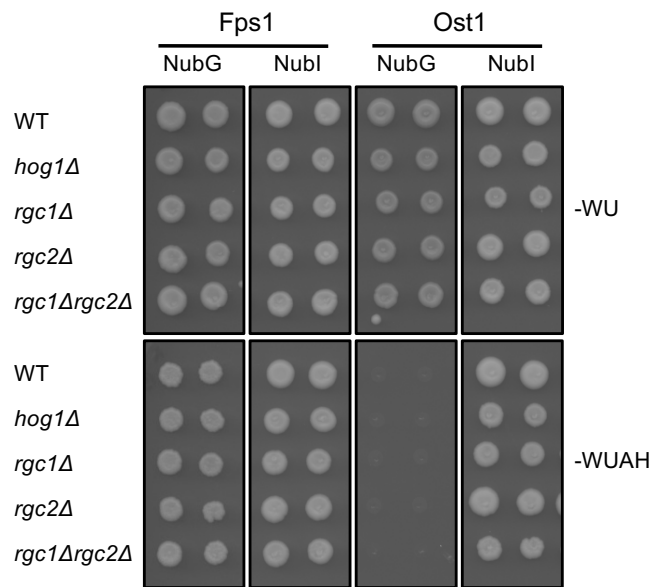

# Supplementary Table 1

| Sho1 MYTH interactor | GO Cellular Function                     | Confirmed through BiFC | Confirmed through co-IP | Reference  |
|----------------------|------------------------------------------|------------------------|-------------------------|------------|
| Aim1                 | Other functions                          | -                      | not attempted           | This study |
| Cad1                 | Nuclear functions                        | -                      | +                       | This study |
| Cdc19                | Gluconeogenesis/glycolysis               | +                      | poor expression         | This study |
| Chs3                 | Cell wall organization                   | not attempted          | not attempted           | [1]        |
| Cwp2                 | Cell wall organization                   | +                      | -                       | This study |
| Dan4                 | Cell wall organization                   | -                      | +                       | This study |
| Dcw1                 | Cell wall organization                   | +                      | not attempted           | This study |
| Dia1                 | Other functions                          | +                      | +                       | This study |
| Ena1                 | Transport                                | -                      | poor expression         | This study |
| Ena2                 | Transport                                | +                      | +                       | This study |
| Ena5                 | Transport                                | +                      | -                       | This study |
| Ent4                 | Endocytosis                              | +                      | +                       | This study |
| Fba1                 | Gluconeogenesis/glycolysis               | +                      | poor expression         | This study |
| Flo1                 | Cell wall organization                   | -                      | +                       | This study |
| Flo5                 | Cell wall organization                   | -                      | +                       | This study |
| Fps1                 | Transport                                | +                      | +                       | This study |
| Gex1                 | Transport                                | not attempted          | not attempted           |            |
| Gln1                 | Amino acid biosynthesis                  | +                      | -                       | This study |
| Gly1                 | Amino acid biosynthesis                  | +                      | +                       | This study |
| Gnd1                 | Other functions                          | +                      | +                       | This study |
| Hsp150               | Cell wall organization                   | -                      | +                       | This study |
| Las17                | Endocytosis                              | not attempted          | not attempted           | [2]        |
| Lys21                | Amino acid biosynthesis                  | +                      | +                       | This study |
| Msb2                 | HOG pathway                              | not attempted          | not attempted           | [3]        |
| Pbs2                 | HOG pathway                              | not attempted          | not attempted           | [4]        |
| Pfk1                 | Gluconeogenesis/glycolysis               | +                      | -                       | This study |
| Pgk1                 | Gluconeogenesis/glycolysis               | +                      | poor expression         | This study |
| Pmp3                 | Transport                                | +                      | +                       | This study |
| Pro3                 | Amino acid biosynthesis                  | +                      | not attempted           | This study |
| Puf2                 | Nuclear functions                        | +                      | +                       | This study |
| Rho1                 | Cell wall organization                   | not attempted          | not attempted           |            |
| Sed1                 | Cell wall organization                   | +                      | +                       | This study |
| Siz1                 | Post-translational modifications         | -                      | +                       | This study |
| Ste11                | HOG pathway                              | not attempted          | not attempted           | [5]        |
| Ste50                | HOG pathway                              | not attempted          | not attempted           | [6]        |
| Tdh3                 | Gluconeogenesis/glycolysis               | +                      | +                       | This study |
| Tor2                 | Actin filament/cytoskeletal organization | -                      | +                       | [7]        |
| Tpm2                 | Actin filament/cytoskeletal organization | +                      | -                       | This study |
| Ubi4                 | Post-translational modifications         | not attempted          | not attempted           | [8]        |
| Wsc2                 | Cell wall organization                   | +                      | -                       | [9]        |
| Yck2                 | Endocytosis                              | +                      | -                       | This study |
| YDR008C              | Unknown                                  | -                      | poor expression         | This study |
| YER134C              | Other functions                          | +                      | +                       | This study |
| YER135C              | Unknown                                  | -                      | +                       | This study |
| YHL048C-A            | Unknown                                  | not attempted          | not attempted           |            |
| YLR154C-G            | Unknown                                  | not attempted          | not attempted           |            |
| YLR154W-B            | Unknown                                  | not attempted          | not attempted           |            |
| YLR198C              | Unknown                                  | not attempted          | not attempted           |            |
| Yta7                 | Nuclear functions                        | -                      | -                       | This study |



## SUPPLEMENTARY REFERENCES

- [1] Labedzka K, Tian C, Nussbaumer U, Timmermann S, Walther P, Mueller J, Johnsson N. Sho1p connects the plasma membrane with proteins of the cytokinesis network via multiple isomeric interaction states. *J. Cell. Sci.* 2012; 125:4103-13.
- [2] Tong AH, Drees B, Nardelli G, Bader GD, Brannetti B, Castagnoli L, Evangelista M, Ferracuti S, Nelson B, Paoluzi S, Quondam M, Zucconi A, Hogue CW, Fields S, Boone C, Cesareni G. A combined experimental and computational strategy to define protein interaction networks for peptide recognition modules. *Science* 2002; 295(5553):321-4
- [3] Cullen PJ, Sabbagh W, Graham E, Irick MM, van Olden EK, Neal C, Delrow J, Bardwell L, Sprague GF. A signaling mucin at the head of the Cdc42- and MAPK-dependent filamentous growth pathway in yeast. *Genes Dev.* 2004; 18(14):1695-708.
- [4] Posas F, Saito H. Osmotic activation of the HOG MAPK pathway via Ste11p MAPKKK: scaffold role of Pbs2p MAPKK. *Science* 1997; 276(5319):1702-5.
- [5] Zarrinpar A, Bhattacharyya RP, Nittler MP, Lim WA. Sho1 and Pbs2 act as coscaffolds linking components in the yeast high osmolarity MAP kinase pathway. *Mol. Cell* 2004; 14(6):825-32.
- [6] Costanzo M, Baryshnikova A, Bellay J, Kim Y, Spear ED, Sevier CS, Ding H, Koh JL, Toufighi K, Mostafavi S, Prinz J, St Onge RP, VanderSluis B, Makhnevych T, Vizeacoumar FJ, Alizadeh S, Bahr S, Brost RL, Chen Y, Cokol M, Deshpande R, Li Z, Lin ZY, Liang W, Marback M, Paw J, San Luis BJ, Shuteriqi E, Tong AH, van Dyk N, Wallace IM, Whitney JA, Weirauch MT, Zhong G, Zhu H, Houry WA, Brudno M, Ragibizadeh S, Papp B, Pal C, Roth FP, Giaever G, Nislow C, Troyanskaya OG, Bussey H, Bader GD, Gingras AC, Morris QD, Kim PM, Kaiser CA, Myers CL, Andrews BJ, Boone C. The genetic landscape of a cell. *Science* 2010; 327(5964):425-31.
- [7] Aguilar PS, Froehlich F, Rehman M, Shales M, Ulitsky I, Olivera-Couto A, Braberg H, Shamir R, Walter P, Mann M, Ejsing CS, Krogan NJ, Walther TC. A plasma-membrane E-MAP reveals links of the eisosome with sphingolipid metabolism and endosomal trafficking. *Nat. Struct. Mol. Biol.* 2010; 17(7):901-8.
- [8] Kolawa NJ, Sweredoski MJ, Graham RL, Oania R, Hess S, Deshaies RJ. Perturbations to the Ubiquitin Conjugate Proteome in Yeast  $\{triangleup\}$ ubx Mutants Identify Ubx2 as a Regulator of Membrane Lipid Composition. *Mol. Cell Proteomics* 2013; 12(10):2791-803.

[9] Birkaya B, Maddi A, Joshi J, Free SJ, Cullen PJ. Role of the cell wall integrity and filamentous growth mitogen-activated protein kinase pathways in cell wall remodeling during filamentous growth. *Eukaryotic Cell* 2009; 8(8):1118-33.
